# Supplementary material
Source: HighWire-hosted journal article supplement (https://bmjophth.bmj.com/content/3/1/e000125)
Supplement: inline-supplementary-material-1 [file inline-supplementary-material-1.docx]

Appendix 1 – Referrals to the HES that were considered unnecessary according to the ophthalmologists participating in MECS.

| Optometrists’ diagnosis | N |
| --- | --- |
| Refractive error | 1 |
| Eyelid and/or lacrimal system disorders | 4 |
| Diseases of the conjunctiva | 1 |
| Disorders of the cornea and sclera | 3 |
| Pupil anomalies | 2 |
| Narrow anterior chamber angle | 1 |
| Posterior vitreous detachment | 6 |
| Age-related macular degeneration | 3 |
| Retinal lesions (not retinal detachment) | 1 |
| Disorders of optic nerve and visual pathway (non-glaucomatous) | 2 |
| Unexplained vision loss | 2 |
