# Supplementary material
Source: HighWire-hosted journal article supplement (https://bmjophth.bmj.com/content/3/1/e000125)
Supplement: inline-supplementary-material-2 [file inline-supplementary-material-2.docx]

Appendix 2 – Referrals to the HES (grouped by disease category) considered inappropriate in urgency.

| Optometrists’ diagnosis | HES diagnoses |
| --- | --- |
| Diseases of the eyelid | Granulation tissue, blepharitis, scleritis* |
| Diseases of the conjunctiva | Cataract, conjunctivitis |
| Disorders of the cornea and sclera | Foreign body*, resolved adenoviral conjunctivitis, meibomitis, chalazion, dry eyes, pingueculitis, bacterial conjunctivitis, episcleritis |
| Disorders of the lens | Macular scar, senile cataract |
| Age-related macular degeneration (AMD) | Wet AMD, dry AMD, BRAO, PCO, ERM |
| Retinal vascular occlusions | BRVO, POAG |
| Glaucoma/Ocular hypertension | Glaucoma, Glaucoma suspect, healthy eyes |
| Posterior vitreous detachment (PVD) | Vitreous Haemorrhage, PVD* |
| Retinal haemorrhages | Retinal vascular disorders, hypertensive retinopathy, PVD, background diabetic retinopathy |
| Visual field defect | Headaches, presbyopia |
| Unexplained vision loss | Dry AMD, Healthy eyes |

BRVO: Branch Retinal Vein Occlusion, BRAO: Branch Retinal Artery Occlusion, PCO: Posterior Capsule Opacification. ERM: epi-retinal membrane, POAG: Primary Open Angle Glaucoma. * A total of four patients were referred less urgently than appropriate.
